# Supplementary material for: The wisdom of the intermediary: the role, function, and ways-of-being of the intermediary in a strategic program for university-industry relations
Source: Springer Nature journal article supplement (doi:10.1186/s40604-016-0039-4), 2016-09-08
Supplement: MOESM1 [file 11901900]

## Multilingual abstract

### Arabic

The Wisdom of the Intermediary

The role, function, and ways-of-being of the intermediary in a strategic program for university-industry relations

Lars Frølund, Morten Ziethen

### المستوى المعرفي للوسيط

دور، وظيفة وسلوك الوسيط في برنامج استراتيجي حول العلاقات بين الجامعة وقطاع الصناعة  
الكاتب (ة) : Lars Frolund, Morten Ziethen

### ملخص

تمثل هذه الورقة تحقيق حول العامل البشري في الوساطة. نعتقد بأننا لازلنا لا نفهم تماما مختلف الأدوار والوظائف وسلوك الوسيط. كما نعتقد أن مفهوم المستوى الأول والثاني للمعرفة يساعدنا على فهم العوامل التي تمكن الوسيط من النجاح. مكنا إجراء تحقيق شامل حول عامل الوساطة البشرية في برنامج إستراتيجي لشركة عالمية للتعاون بين الجامعة وقطاع الصناعة من وضع تصنيف يركز على ثلاثة أدوار أساسية: 'سلطة الباعث'، الدبلوماسية والتكامل الإبداعي. بالاستناد على هذا التصنيف، نعتقد أن المستوى المعرفي للوسيط يشمل التمكن من مختلف الأدوار (المستوى الأول للمعرفة)، وتقدير أهمية كل دور حسب كل حالة وساطة على حدة (المستوى الثاني للمعرفة). لذلك، فإننا نقترح الاعتماد على أعمال هارجادون وساتون لدراسة العنصر البشري في الوساطة، وبالتالي زيادة إضفاء الطابع الإنساني على البحوث المتعلقة بالوساطة.
